# Supplementary material
Source: publisher figshare collection journal article supplement (https://sage.figshare.com/ndownloader/files/23017889)
Supplement: Supplementary file 1 [file 23017889]

Supplementary Materials to

Using the Standardized Root Mean Squared Residual (SRMR) to Assess Exact Fit in Structural Equation Models

Goran Pavlov1,2

Alberto Maydeu-Olivares1,2

Dexin Shi1

1 University of South Carolina

2 University of Barcelona

#############################################################################

#This R function conducts the exact fit test using SRMR#

#############################################################################

#install and load the lavaan package

install.packages("lavaan")

library(lavaan)

#Set the working dictionary and Read the Data

setwd("C:/EXACTFITSRMR")

Data=read.csv("DATA.csv",header = F,sep = ",")

# Fitting the SEM model using lavaan

cfa.model <- ' f =~ NA*V1 + V2 + V3 + V4 + V5 + V6 + V7 + V8 + V9 + V10

f~~1*f'

fit <- cfa(cfa.model, data = Data, estimator = "ML",meanstructure = FALSE,fixed.x = FALSE)

#Read the code/function for computation, put "lav_fit_usrmr_ucrmr.R" in the same working dictionary

source("lav_fit_usrmr_ucrmr.R")

# Obtain Normal-Theory Results

lav_fit_usrmr_ucrmr (lavobject = fit, ADF = FALSE)

# Obtain ADF Results

lav_fit_usrmr_ucrmr (lavobject = fit, ADF = TRUE)

#############################################################################

# Notes #

#This function works for models with a single group, no mean structure, and continuous outcomes #

#listwise deletion should be applied when there is missing data #

#############################################################################
